# Supplementary material for: Solar cells sensitized by donor-linked concerted companion dyes
Source: Royal Society of Chemistry journal article supplement (doi:10.1039/d2tc05167b), 2023-01-01
Supplement: d2tc05167b1.pdf [file d2tc05167b1.pdf]

## Electronic Supporting Information (ESI)

### Solar cells sensitized by donor-linked concerted companion dyes

Jiixin Luo,<sup>a</sup> Yuqing Wang,<sup>a</sup> Shaojin Shi,<sup>a</sup> Yuankun Wu,<sup>a</sup> Taochun Ma,<sup>a</sup> Leyao Wang,<sup>a</sup> Glib Baryshnikov,<sup>b</sup> Xinyan Wu,<sup>\*a</sup> Chengjie Li<sup>\*a</sup> and Yongshu Xie<sup>\*a</sup>

<sup>a</sup> Key Laboratory for Advanced Materials and Joint International Research Laboratory of Precision Chemistry and Molecular Engineering, Feringa Nobel Prize Scientist Joint Research Center, Frontiers Science Center for Materiobiology and Dynamic Chemistry, Institute of Fine Chemicals, School of Chemistry and Molecular Engineering, East China University of Science & Technology, Shanghai 200237, China

<sup>b</sup> Department of Science and Technology, Laboratory of Organic Electronics, Linköping University, Norrköping 60174, Sweden

\*Email: yshxie@ecust.edu.cn; chengjie.li@ecust.edu.cn; xinyanwu@ecust.edu.cn.

### Contents

|                                                   |    |
|---------------------------------------------------|----|
| 1 Experimental section.....                       | 2  |
| 1.1 Materials and instrumentation.....            | 2  |
| 1.2 Fabrication of the solar cells .....          | 3  |
| 1.3 Theoretical calculation details .....         | 3  |
| 2 Absorption data and emission spectra.....       | 4  |
| 3 Electrochemical behavior.....                   | 4  |
| 4 Photovoltaic properties .....                   | 5  |
| 5 Desorption curves and linear fitting.....       | 9  |
| 6 FTIR spectra.....                               | 10 |
| 7 Theoretical calculations .....                  | 11 |
| 8 Electrochemical impedance spectroscopy .....    | 12 |
| 9 Characterization spectra for the compounds..... | 13 |
| 10 References.....                                | 22 |

# 1 Experimental section

## 1.1 Materials and instrumentation

All chemical reagents and solvents of analytical grade were purchased and used without further purification unless otherwise noted. Fluorine-doped SnO<sub>2</sub> conducting glass (FTO glass, transparency > 90% in the visible range, sheet resistance 15 Ω/square) was purchased from the Advanced Election Technology Co., Ltd. TiO<sub>2</sub> paste (18 NR-T and 18 NR-AO) was purchased from the Greatcell Solar Industries Pty Ltd.

<sup>1</sup>H NMR and <sup>13</sup>C NMR spectra were recorded using a Bruker AM 400 spectrometer at 298 K with tetramethylsilane (TMS) used as the internal standard. HRMS data were collected using a Waters LCT Premier XE spectrometer or a JEOL-JMS-T100LP AccuTOF spectrometer. Matrix-assisted laser desorption/ionization time-of-flight mass spectra (MALDI-TOF-MS) were measured on a Shimadzu-Kratos model Axima CFR + mass spectrometer using dithranol as the matrix. UV-Vis absorption spectra were measured on a Shimadzu UV2600 spectrophotometer, and fluorescence spectra were recorded on a Varian Cary Eclipse fluorescence spectrophotometer. The cyclic voltammograms of the dyes were carried out in CH<sub>2</sub>Cl<sub>2</sub> on a CorrTest electrochemical workstation based on a three electrode system using 0.1 M TBAPF<sub>6</sub> in CH<sub>2</sub>Cl<sub>2</sub> as the supporting electrolyte, a platinum ring as the working electrode, a platinum wire as the counter electrode, and a Ag/AgCl electrode in saturated KCl solution as the reference electrode. The scan rate was fixed at 100 mV s<sup>-1</sup>.

Photovoltaic measurements were performed by employing an AM 1.5 solar simulator equipped with a 300 W xenon lamp (model No. 91160, Oriel). The power of the simulated light was calibrated to 100 mW cm<sup>-2</sup> using a Newport Oriel PV reference cell system (model 91150 V). *J-V* curves were obtained by applying an external bias to the cell and measuring the generated photocurrent with a model 2400 source meter (Keithley Instruments, Inc. USA). The voltage step and delay time of the photocurrent were 10 mV and 40 ms, respectively. Action spectra of the incident monochromatic photon-to-electron conversion efficiency (IPCE) for the solar cells were obtained with a Newport-74125 system (Newport Instruments). The intensity of monochromatic light was measured with a Si detector (Newport 71640). The electrochemical impedance spectroscopy (EIS) measurements of all the DSSCs were performed using a Zahner IM6e Impedance Analyzer (ZAHNER-Elektrik GmbH & CoKG, Kronach, Germany), with the frequency range of 0.1 Hz–100 kHz and the alternative signal of 10 mV. The ZSimpWin software was used to fit the experimental EIS data.

## 1.2 Fabrication of the solar cells

The FTO conducting glass was washed with a detergent solution, deionized water, acetone and ethanol successively for 20 min under ultrasonication before use. For cobalt-based electrolyte, the FTO glass plates were immersed in 40 mM  $\text{TiCl}_4$  aqueous solution at 70 °C for 30 min, then washed with deionized water and ethanol. The pretreated FTO glass was heated at 450 °C for 30 min. The  $\text{TiO}_2$  photoanode was then prepared by repetitive screen-printing. Afterwards, the  $\text{TiO}_2$  films were heated with a programmed procedure at 275 °C for 5 min, 325 °C for 5 min, 375 °C for 5 min, 450 °C for 15 min, and 500 °C for 15 min. The resulting layers were post-treated with 40 mM  $\text{TiCl}_4$  aqueous solution at 70 °C for 30 min and sintered once again at 450 °C for 30 min. The active area of the  $\text{TiO}_2$  photoanode is 0.12 cm<sup>2</sup>. Then they were immersed in a 0.2 mM solution of the porphyrin dyes or CC dyes or a 0.3 mM solution of the organic dyes in a mixture of chloroform and ethanol (volume ratio of 1:1) for 10 h at 25 °C for dye uptake. For the counter electrode,  $\text{H}_2\text{PtCl}_6$  in 2-propanol was evenly distributed on FTO glass through spin coating, and the cathode was heated at 400 °C for 15 min. Eventually, the two electrodes were sealed with thermoplastic Surlyn (25  $\mu\text{m}$ ), and the electrolyte solution was injected through a hole in the counter electrode to complete the fabrication of the sandwich-type solar cells. The iodine-based electrolyte was composed of 0.1 M LiI, 0.05 M  $\text{I}_2$ , 0.6 M 1, 2-dimethyl-3-propyl-imidazolium iodide (DMPII) and 0.5 M 4-tert-butylpyridine (TBP) in acetonitrile. The cobalt-based electrolyte was composed of 0.22 M  $[\text{Co}(\text{bpy})_3](\text{TFSI})_2$ , 0.05 M  $[\text{Co}(\text{bpy})_3](\text{TFSI})_3$ , 0.1 M LiTFSI, and 0.6 M TBP in acetonitrile.

## 1.3 Theoretical calculation details

Theoretical calculations were carried out using Gaussian16 program package at basis set of ZDO and method of PM6.<sup>1,2</sup>

## 2 Absorption data and emission spectra

**Table S1** Absorption data for the sensitizers.

| Dyes        | $\lambda_{\max}^a$ / nm ( $\epsilon / 10^3 \text{ M}^{-1} \text{ cm}^{-1}$ ) | $\lambda_{\max}^b$ / nm |
|-------------|------------------------------------------------------------------------------|-------------------------|
| <b>XW85</b> | 456 (338.2), 664 (69.1)                                                      | 656                     |
| <b>XW86</b> | 456 (332.6), 664 (68.0)                                                      | 656                     |
| <b>XL3</b>  | 365 (42.2), 507 (32.7)                                                       | 512                     |
| <b>XW10</b> | 457 (342.7), 590 (12.1), 664 (84.9)                                          | 663                     |
| <b>XW76</b> | 360 (69.0), 458 (342.0), 664 (75.8)                                          | 658                     |

a) Absorption maxima of the sensitizers in THF; b) absorption maxima of the sensitizers adsorbed on TiO<sub>2</sub> films (2  $\mu\text{m}$ ).

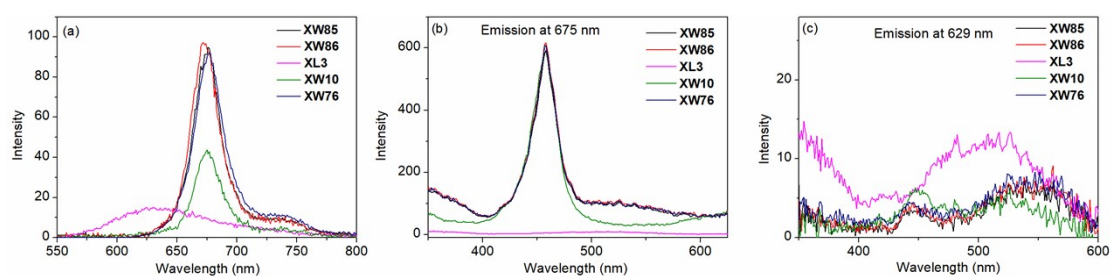

**Figure S1** Fluorescence spectra of the dyes in THF ( $1 \times 10^{-6} \text{ M}$ ). Emission spectra,  $\lambda_{\text{ex}} = 507 \text{ nm}$  (a); and excitation spectra,  $\lambda_{\text{em}} = 675 \text{ nm}$  (b), and  $\lambda_{\text{em}} = 629 \text{ nm}$  (c).

## 3 Electrochemical behavior

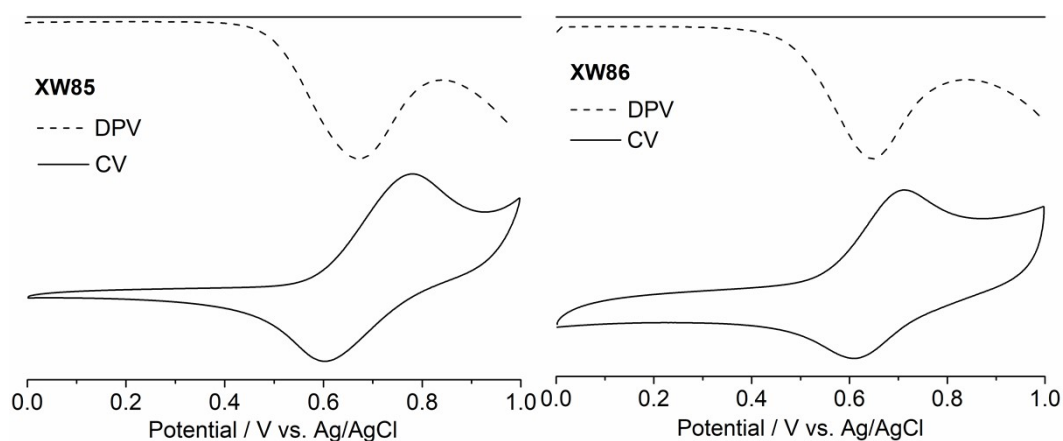

**Figure S2** Cyclic voltammetry (CV) and differential pulse voltammetry (DPV) plots of **XW85** and **XW86** versus Ag/AgCl electrode.

## 4 Photovoltaic properties

**Table S2** Photovoltaic parameters for the DSSCs based on the sequential cosensitization of **XW10** and **XL3**.

| Devices               | $V_{oc}$ / mV | $J_{sc}$ / mA·cm <sup>-2</sup> | FF / %     | PCE / %   | Dye loading [ $\times 10^{-7}$ mol·cm <sup>-2</sup> ] |            |
|-----------------------|---------------|--------------------------------|------------|-----------|-------------------------------------------------------|------------|
|                       |               |                                |            |           | <b>XW10</b>                                           | <b>XL3</b> |
| <b>S1<sup>a</sup></b> | 779           | 17.02                          | 69.56      | 9.22      | 0.25                                                  | 1.70       |
|                       | 782           | 17.30                          | 69.42      | 9.39      |                                                       |            |
|                       | 778           | 16.92                          | 69.99      | 9.22      |                                                       |            |
|                       | 776           | 16.97                          | 69.94      | 9.21      |                                                       |            |
| Averaged values       | 779±2         | 17.05±0.15                     | 69.73±0.24 | 9.26±0.08 |                                                       |            |
| <b>S2<sup>b</sup></b> | 782           | 16.85                          | 69.37      | 9.14      | 0.21                                                  | 1.83       |
|                       | 780           | 17.11                          | 68.76      | 9.17      |                                                       |            |
|                       | 786           | 17.15                          | 69.43      | 9.36      |                                                       |            |
|                       | 786           | 16.58                          | 68.86      | 8.98      |                                                       |            |
| Averaged values       | 783±3         | 16.92±0.23                     | 69.11±0.30 | 9.16±0.14 |                                                       |            |
| <b>S3<sup>c</sup></b> | 783           | 16.68                          | 69.21      | 9.04      | 0.16                                                  | 1.98       |
|                       | 790           | 16.50                          | 69.73      | 9.09      |                                                       |            |
|                       | 792           | 16.60                          | 69.26      | 9.10      |                                                       |            |
|                       | 788           | 16.73                          | 69.00      | 9.09      |                                                       |            |
| Averaged values       | 788±3         | 16.63±0.09                     | 69.3±0.27  | 9.08±0.02 |                                                       |            |

Sensitization time: a) **XW10** (10 h), **XL3** (1.5 h); b) **XW10** (10 h), **XL3** (2.5 h); c) **XW10** (10 h), **XL3** (3.5 h).

**Table S3** Photovoltaic parameters for the DSSCs based on the cocktail cosensitization of **XW10** and **XL3** (sensitization time: 10 h).

| Devices               | $V_{oc}$ / mV | $J_{sc}$ / mA·cm <sup>-2</sup> | FF / %     | PCE / %   | Dye loading [ $\times 10^{-7}$ mol·cm <sup>-2</sup> ] |            |
|-----------------------|---------------|--------------------------------|------------|-----------|-------------------------------------------------------|------------|
|                       |               |                                |            |           | <b>XW10</b>                                           | <b>XL3</b> |
| <b>M1<sup>a</sup></b> | 775           | 16.69                          | 69.88      | 9.04      | 0.083                                                 | 2.18       |
|                       | 780           | 16.20                          | 69.63      | 8.80      |                                                       |            |
|                       | 784           | 15.85                          | 69.85      | 8.68      |                                                       |            |
|                       | 782           | 16.14                          | 70.85      | 8.94      |                                                       |            |
| Averaged values       | 780±3         | 16.22±0.30                     | 70.05±0.47 | 8.87±0.14 |                                                       |            |
| <b>M2<sup>b</sup></b> | 787           | 15.94                          | 70.46      | 8.83      | 0.070                                                 | 2.31       |
|                       | 781           | 16.28                          | 70.00      | 8.89      |                                                       |            |
|                       | 780           | 16.71                          | 70.80      | 9.23      |                                                       |            |
|                       | 787           | 16.64                          | 71.13      | 9.31      |                                                       |            |
| Averaged values       | 784±3         | 16.39±0.31                     | 70.6±0.42  | 9.07±0.21 |                                                       |            |
| <b>M3<sup>c</sup></b> | 791           | 16.23                          | 70.63      | 9.06      | 0.042                                                 | 2.35       |
|                       | 789           | 16.64                          | 70.62      | 9.27      |                                                       |            |
|                       | 797           | 16.95                          | 70.20      | 9.49      |                                                       |            |
|                       | 799           | 16.57                          | 70.14      | 9.28      |                                                       |            |
| Averaged values       | 794±4         | 16.6±0.26                      | 70.4±0.23  | 9.28±0.15 |                                                       |            |

Concentrations: a) **XW10** (0.2 mM), **XL3** (0.1 mM); b) **XW10** (0.15 mM), **XL3** (0.15 mM); c) **XW10** (0.1 mM), **XL3** (0.2 mM).

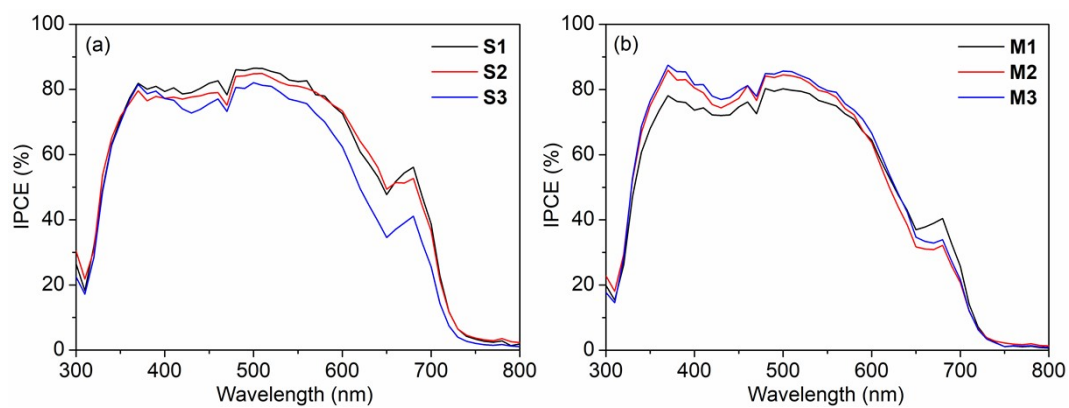

**Figure S3** IPCE spectra of the DSSCs based on a) sequential and b) cocktail cosensitization.

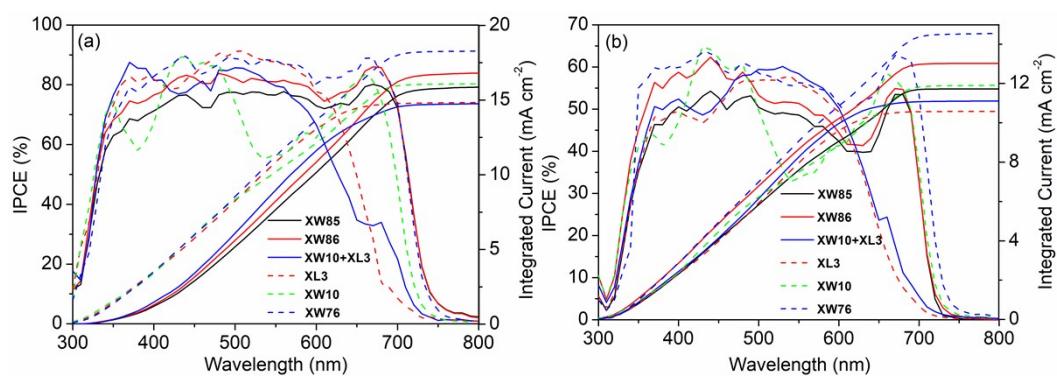

**Figure S4** IPCE spectra and integral  $J_{sc}$  curves for the DSSCs based on (a)  $I_3^-/I^-$  and (b)  $Co^{3+/2+}$  electrolytes.

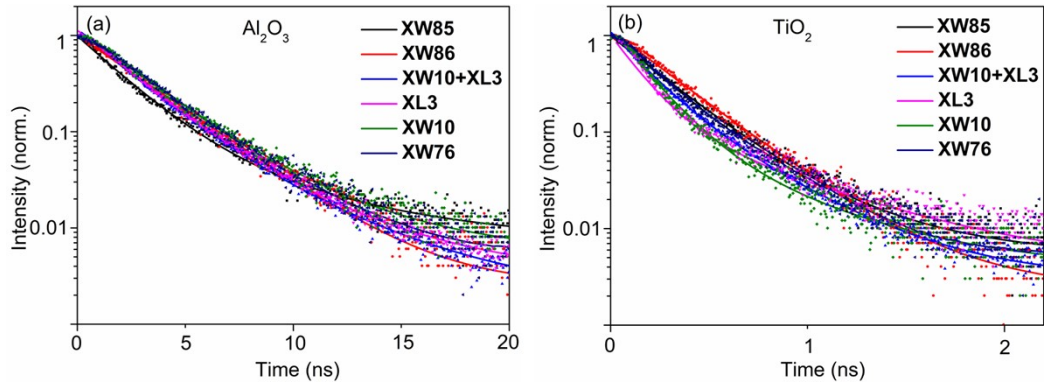

**Figure S5** PL decay traces of dye-grafted (a)  $\text{Al}_2\text{O}_3$  films and (b)  $\text{TiO}_2$  films. Excitation wavelength: 450 nm. Emission wavelength: 680 nm for **XW85**, **XW86**, **XW10**, **XW76**; 630 nm for **XW10+XL3**, **XL3**.

**Table S4** Time coefficients and relative amplitudes of PL decay traces.

| Dyes            | Film                    | $\tau_1$ (ns) | $A_1$ (%) | $\tau_2$ (ns) | $A_2$ (%) | $\tau_{av}$ <sup>a</sup> (ns) | $\eta_{inj}$ <sup>b</sup> (%) |
|-----------------|-------------------------|---------------|-----------|---------------|-----------|-------------------------------|-------------------------------|
| <b>XW85</b>     | $\text{Al}_2\text{O}_3$ | 0.84          | 55.36     | 3.35          | 44.64     | 1.96                          | 85.81                         |
|                 | $\text{TiO}_2$          | 0.16          | 79.35     | 0.72          | 20.65     | 0.28                          |                               |
| <b>XW86</b>     | $\text{Al}_2\text{O}_3$ | 1.16          | 44.80     | 2.78          | 55.20     | 2.05                          | 86.13                         |
|                 | $\text{TiO}_2$          | 0.14          | 73.85     | 0.69          | 26.15     | 0.29                          |                               |
| <b>XW10+XL3</b> | $\text{Al}_2\text{O}_3$ | 1.05          | 32.27     | 2.61          | 67.73     | 2.11                          | 88.01                         |
|                 | $\text{TiO}_2$          | 0.13          | 77.53     | 0.67          | 22.47     | 0.25                          |                               |
| <b>XL3</b>      | $\text{Al}_2\text{O}_3$ | 0.98          | 41.19     | 2.97          | 58.81     | 2.15                          | 89.56                         |
|                 | $\text{TiO}_2$          | 0.12          | 86.53     | 0.90          | 13.47     | 0.23                          |                               |
| <b>XW10</b>     | $\text{Al}_2\text{O}_3$ | 1.06          | 44.00     | 3.14          | 56.00     | 2.23                          | 88.33                         |
|                 | $\text{TiO}_2$          | 0.11          | 79.47     | 0.84          | 20.53     | 0.26                          |                               |
| <b>XW76</b>     | $\text{Al}_2\text{O}_3$ | 1.06          | 43.91     | 3.06          | 56.09     | 2.18                          | 87.40                         |
|                 | $\text{TiO}_2$          | 0.14          | 75.75     | 0.70          | 24.25     | 0.28                          |                               |

a) The values of  $\tau_{av}$  were determined with  $\tau_{av} = \sum_{i=1}^n A_i \tau_i$  ; b)  $\eta_{inj} = 1 - \tau_{\text{TiO}_2} / \tau_{\text{Al}_2\text{O}_3}$ <sup>3</sup>

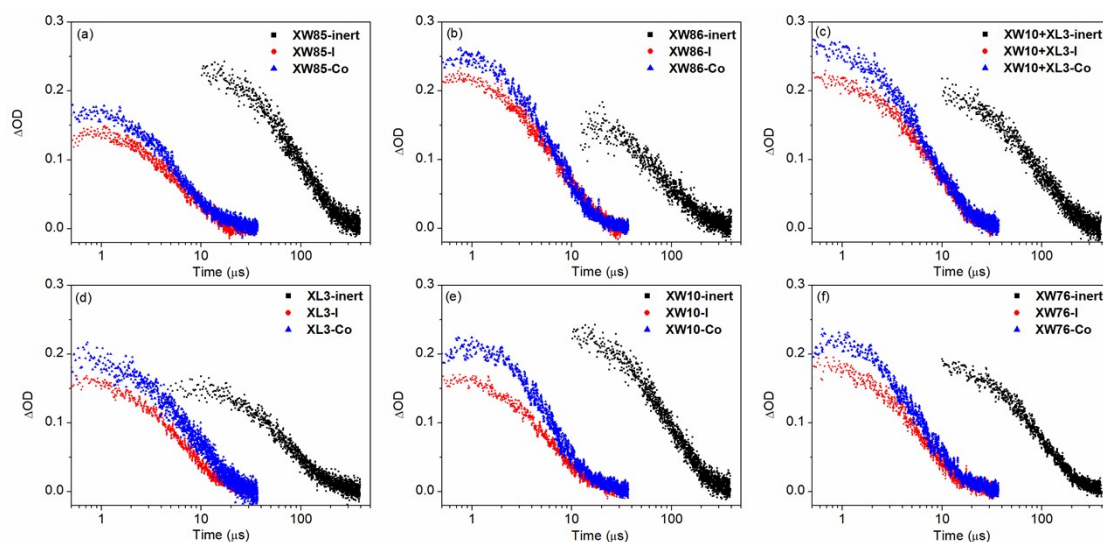

**Figure S6** Transient absorption profiles of the TiO<sub>2</sub> films sensitized with (a) **XW85**, (b) **XW86**, (c) **XW10+XL3**, (d) **XL3**, (e) **XW10**, and (f) **XW76** with inert electrolyte (0.1 M TBP and 0.1 M LiTFSI in acetonitrile), iodine-based electrolyte, and cobalt-based electrolyte, respectively. Excitation wavelengths: 450 nm for **XW85**, **XW86**, **XW10**, and **XW76**; 532 nm for **XW10+XL3** and **XL3**. Probe wavelength: 780 nm. The fitted times are obtained by the multi-exponential function.

**Table S5** Recombination time constants ( $\tau_{\text{rec}}$ ) and regeneration half times ( $\tau_{1/2}$ ) extracted from transient absorption measurement and the calculated dye regeneration efficiencies ( $\eta_{\text{reg}} = 1 - \tau_{\text{electrolyte}} / \tau_{\text{inert}}$ ).<sup>3</sup>

| Dyes            | $\tau_{\text{rec}}$ ( $\mu\text{s}$ ) | $\tau_{1/2}\text{-I}$ ( $\mu\text{s}$ ) | $\eta_{\text{reg-I}}$ (%) | $\tau_{1/2}\text{-Co}$ ( $\mu\text{s}$ ) | $\eta_{\text{reg-Co}}$ (%) |
|-----------------|---------------------------------------|-----------------------------------------|---------------------------|------------------------------------------|----------------------------|
| <b>XW85</b>     | 82                                    | 5.7                                     | 93.0                      | 6.9                                      | 91.6                       |
| <b>XW86</b>     | 79                                    | 6.7                                     | 91.5                      | 5.6                                      | 92.9                       |
| <b>XW10+XL3</b> | 96                                    | 8.4                                     | 91.3                      | 8.0                                      | 91.2                       |
| <b>XL3</b>      | 99                                    | 7.1                                     | 92.8                      | 9.3                                      | 90.6                       |
| <b>XW10</b>     | 82                                    | 5.9                                     | 92.8                      | 6.5                                      | 92.1                       |
| <b>XW76</b>     | 86                                    | 6.3                                     | 92.7                      | 5.6                                      | 93.5                       |



## 5 Desorption curves and linear fitting

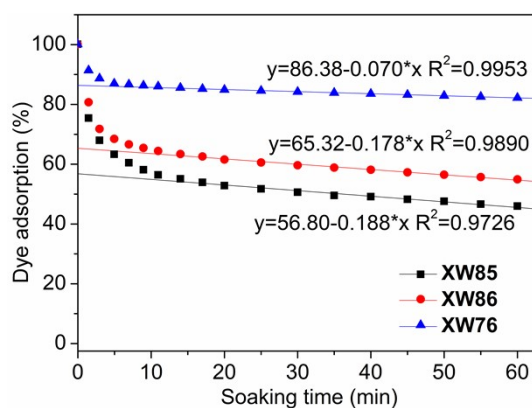

**Figure S7** The desorption curves for the dyes and the linear fitting of the slow desorption processes for calculating the double-anchoring dye amounts, and the corresponding data are listed in **Table S6**.

**Table S6** The double-anchoring and single-anchoring dye amounts obtained from the linear fitting of the desorption curves.<sup>a</sup>

| Samples     | double-anchoring (%) | single-anchoring (%) | double/single ratio |
|-------------|----------------------|----------------------|---------------------|
| <b>XW85</b> | 56.80                | 43.20                | 1.31                |
| <b>XW86</b> | 65.32                | 34.68                | 1.88                |
| <b>XW76</b> | 86.38                | 13.62                | 6.34                |

a) The proportion of double-anchoring was estimated according to the intercept of the fitting curve, while the remainder was that of single-anchoring.

## 6 FTIR spectra

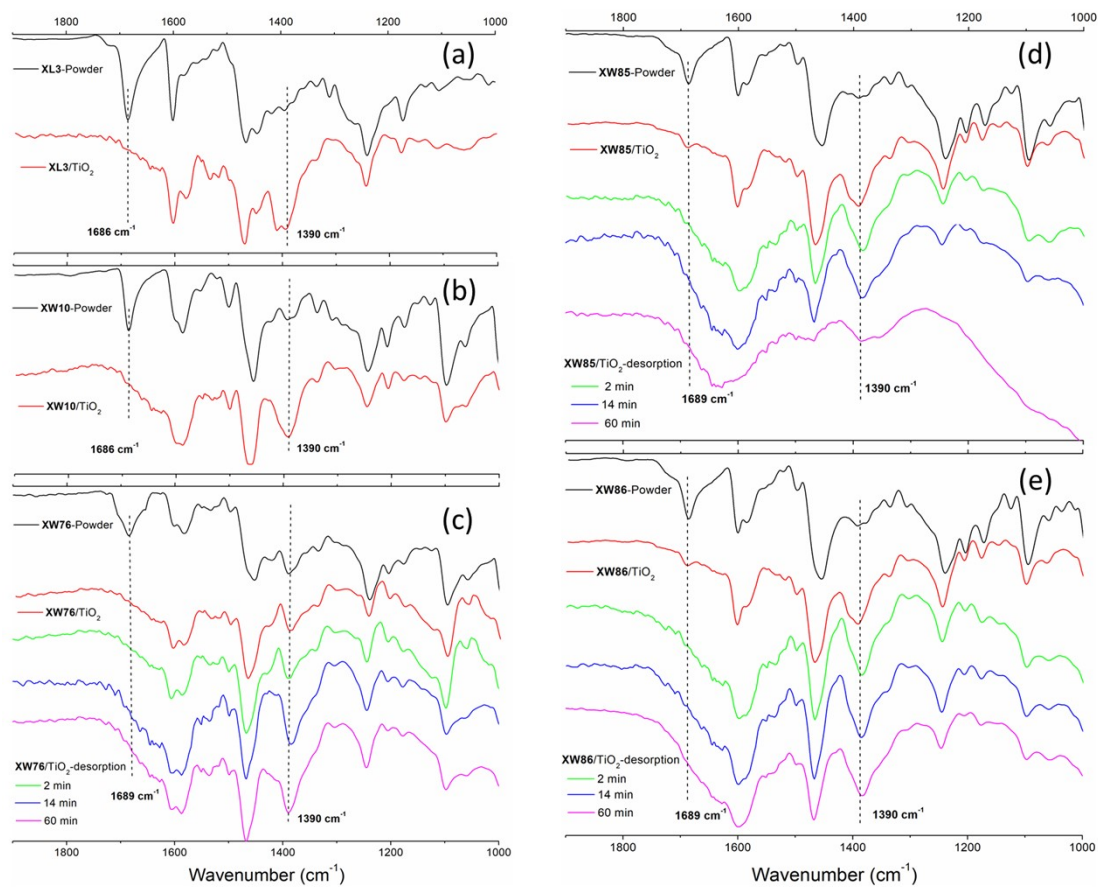

**Figure S8** ATR-FTIR spectra of the dyes in the powder state, and adsorbed on the  $\text{TiO}_2$  films. For the CC dyes, the IR changes during the desorption processes are shown at time intervals indicated in (c), (d), and (e).

## 7 Theoretical calculations

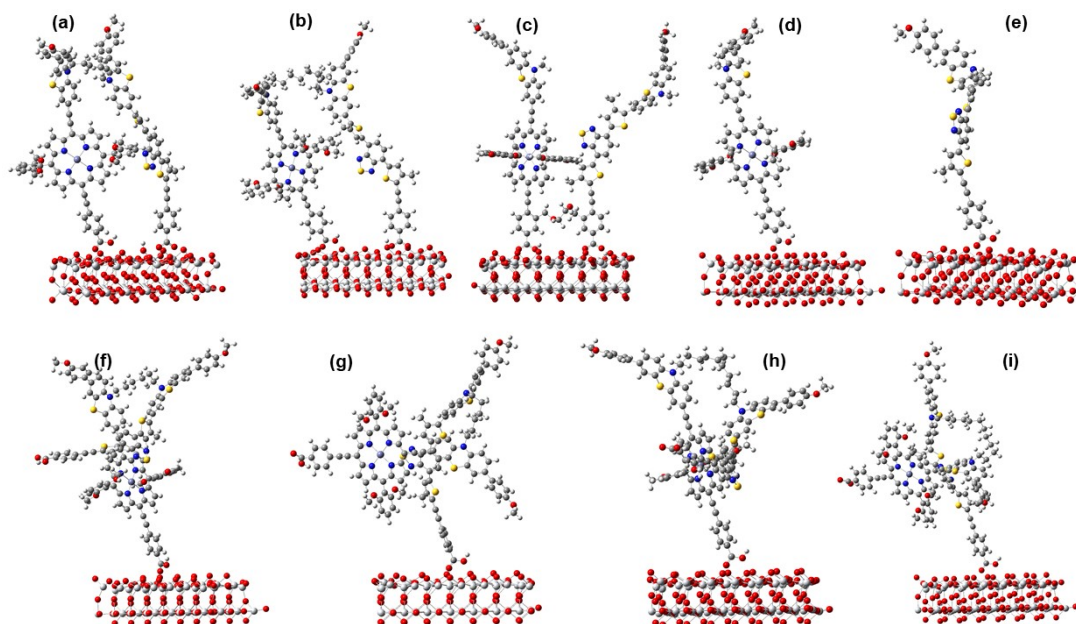

**Figure S9** The optimized structures for the dyes adsorbed on the TiO<sub>2</sub> surface for **XW85** (a), **XW86** (b) and **XW76** (c) in double-anchoring mode, and **XW10** (d), **XL3** (e), as well as the single-anchoring modes for **XW85** and **XW86** *via* the porphyrin unit (f, h) and the organic unit (g, i), respectively.

**Table S7** The calculated binding energies ( $E_{be}$ ) for the dyes anchored on TiO<sub>2</sub> in different modes.

| Dyes                   | <b>XW85</b> <sup>a</sup> | <b>XW85</b> <sup>b</sup> | <b>XW85</b> <sup>c</sup> | <b>XW86</b> <sup>a</sup> | <b>XW86</b> <sup>b</sup> | <b>XW86</b> <sup>c</sup> | <b>XW76</b> <sup>a</sup> | <b>XL3</b> | <b>XW10</b> |
|------------------------|--------------------------|--------------------------|--------------------------|--------------------------|--------------------------|--------------------------|--------------------------|------------|-------------|
| $E_{be}$<br>(kcal/mol) | 23.8                     | 1.7                      | 8.9                      | 26.0                     | 6.1                      | 11.0                     | 38.4                     | 2.1        | 2.1         |

a) Double-anchored dyes; b) single-anchored dyes *via* the organic unit; and (c) single-anchored dyes *via* the porphyrin unit.

## 8 Electrochemical impedance spectroscopy

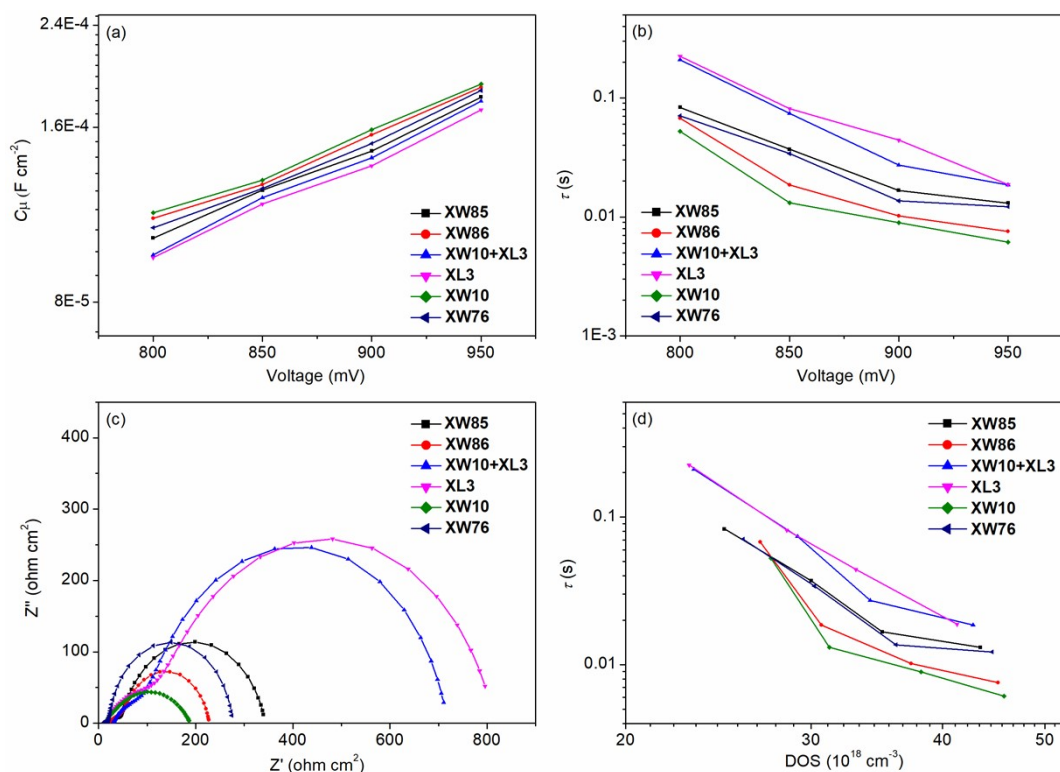

**Figure S10** Plots of (a)  $C_{\mu}$ , (b)  $\tau$  versus the bias voltages, (c) complex-plane plots at bias potential of  $-0.85$  V, and (d)  $\tau$  versus  $DOS$  of the DSSCs using the  $Co^{3+/2+}$  electrolyte.

**Table S8** Fitted EIS parameters for all devices using  $I_3^-/I^-$  at a bias potential of  $-0.75$  V and  $Co^{3+/2+}$  at a bias potential of  $-0.85$  V.<sup>a</sup>

| Dyes            | Electrolytes | $C_{\mu}$ (mF cm <sup>-2</sup> ) | $R_{rec}$ ( $\Omega$ cm <sup>2</sup> ) | $R_{tr}$ ( $\Omega$ cm <sup>2</sup> ) | $\tau$ (s) | $\eta_{col}^b$ (%) |
|-----------------|--------------|----------------------------------|----------------------------------------|---------------------------------------|------------|--------------------|
| <b>XW85</b>     | $I_3^-/I^-$  | 0.369                            | 199.9                                  | 14.2                                  | 0.074      | 93.3               |
| <b>XW86</b>     | $I_3^-/I^-$  | 0.373                            | 81.8                                   | 11.1                                  | 0.031      | 88.1               |
| <b>XW10+XL3</b> | $I_3^-/I^-$  | 0.370                            | 698.6                                  | 18.3                                  | 0.259      | 97.4               |
| <b>XL3</b>      | $I_3^-/I^-$  | 0.366                            | 784.1                                  | 15.3                                  | 0.287      | 98.1               |
| <b>XW10</b>     | $I_3^-/I^-$  | 0.368                            | 60.0                                   | 9.9                                   | 0.022      | 85.8               |
| <b>XW76</b>     | $I_3^-/I^-$  | 0.387                            | 171.6                                  | 12.9                                  | 0.066      | 93.0               |
| <b>XW85</b>     | $Co^{3+/2+}$ | 0.125                            | 296.1                                  | 48.4                                  | 0.037      | 85.9               |
| <b>XW86</b>     | $Co^{3+/2+}$ | 0.127                            | 145.8                                  | 28.0                                  | 0.019      | 83.9               |
| <b>XW10+XL3</b> | $Co^{3+/2+}$ | 0.121                            | 609.5                                  | 79.6                                  | 0.074      | 88.4               |
| <b>XL3</b>      | $Co^{3+/2+}$ | 0.118                            | 688.2                                  | 111.1                                 | 0.081      | 86.1               |
| <b>XW10</b>     | $Co^{3+/2+}$ | 0.130                            | 101.1                                  | 19.5                                  | 0.013      | 83.8               |
| <b>XW76</b>     | $Co^{3+/2+}$ | 0.126                            | 271.0                                  | 47.2                                  | 0.034      | 85.2               |

a)  $R_{rec}$ : Charge recombination resistance,  $R_{tr}$ : transport resistance,  $\eta_{col}$ : charge collection efficiency; b)  $\eta_{col} = (1 + R_{tr} / R_{rec})^{-1.4}$

## 9 Characterization spectra for the compounds

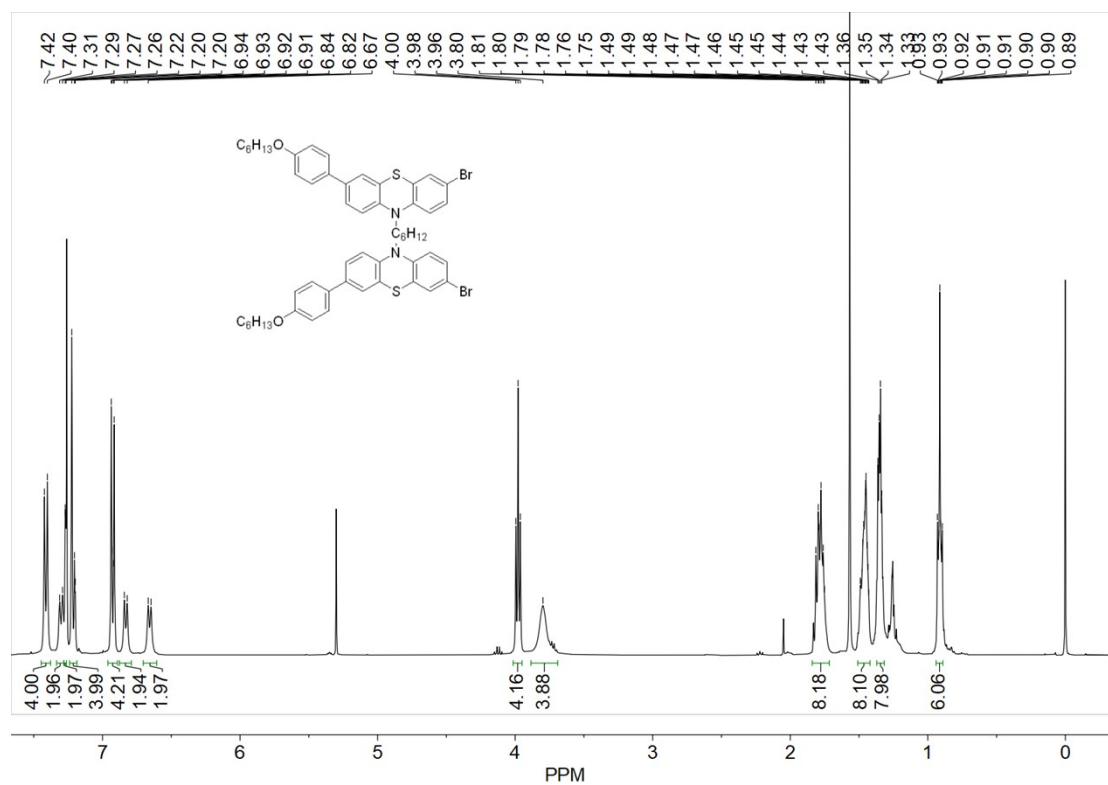

**Figure S11** The <sup>1</sup>H NMR spectrum of compound **1a** in CDCl<sub>3</sub>.

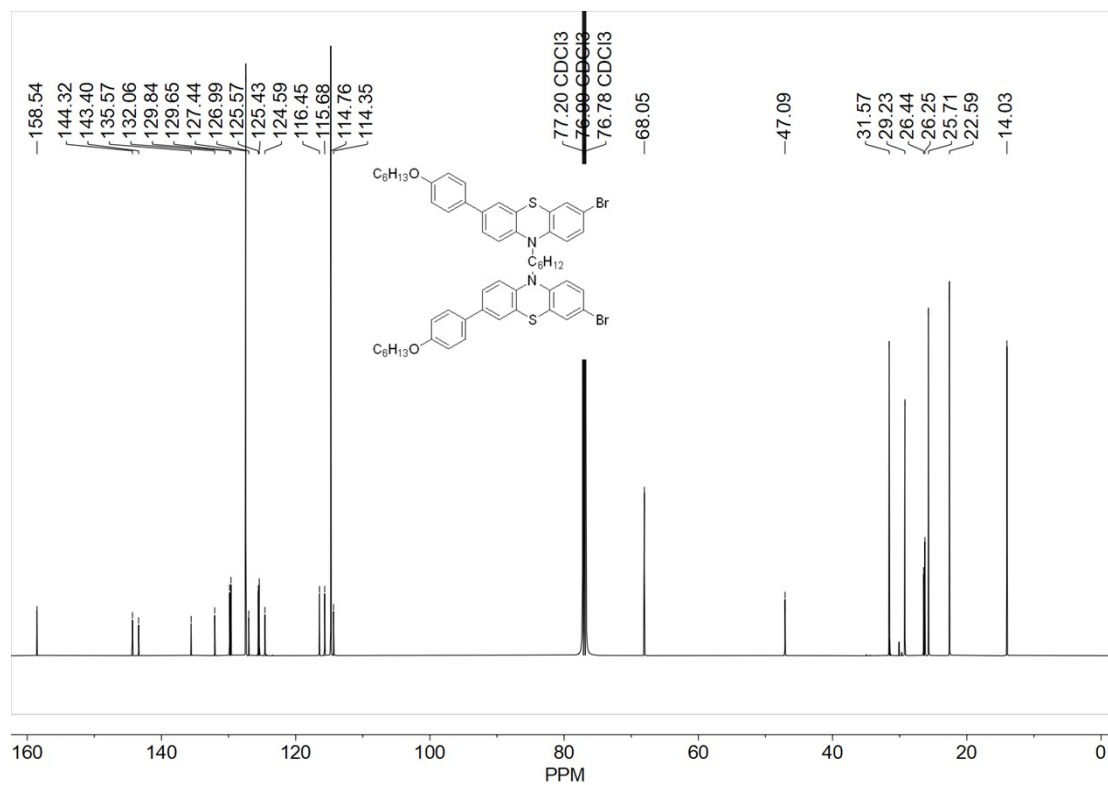

**Figure S12** The <sup>13</sup>C NMR spectrum of compound **1a** in CDCl<sub>3</sub>.

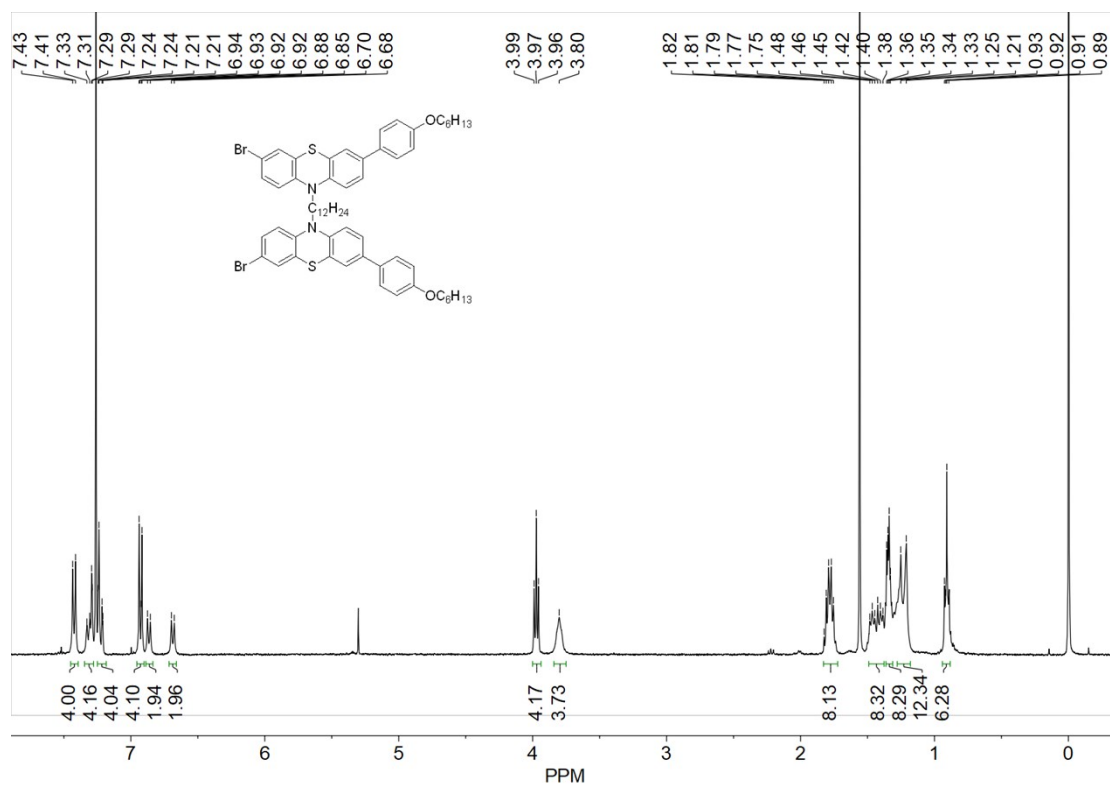

**Figure S13** The <sup>1</sup>H NMR spectrum of compound **1b** in CDCl<sub>3</sub>.

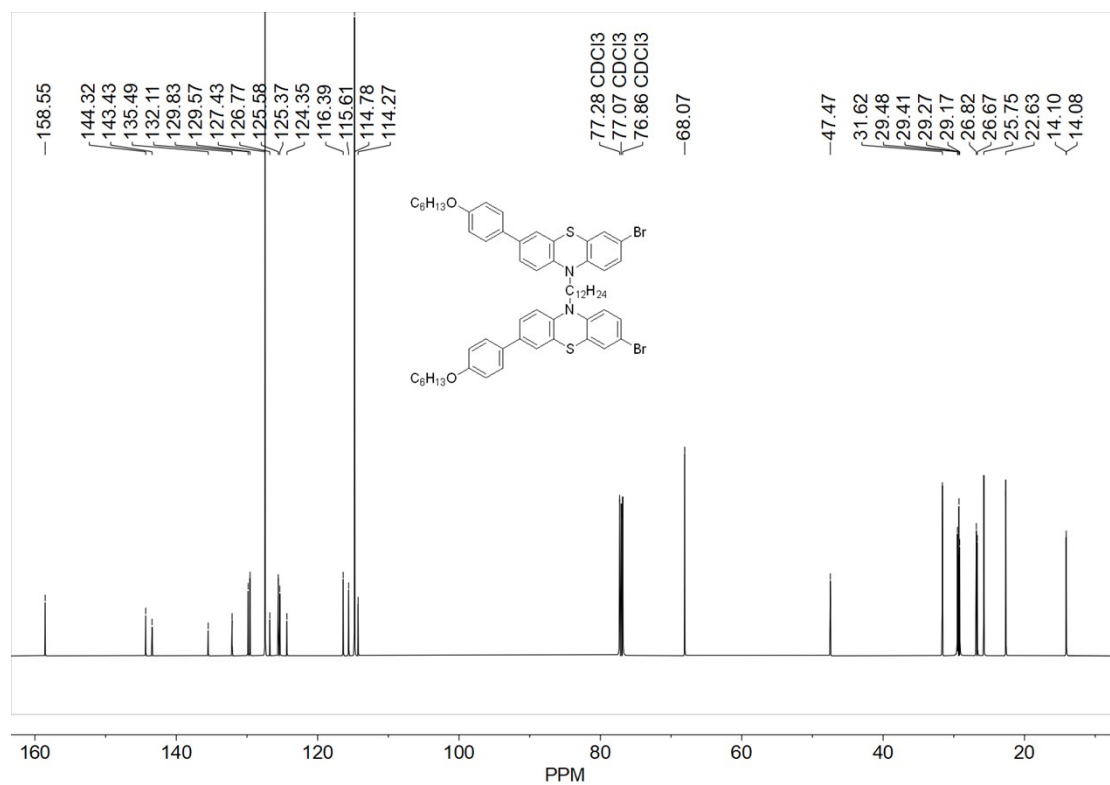

**Figure S14** The <sup>13</sup>C NMR spectrum of compound **1b** in CDCl<sub>3</sub>.

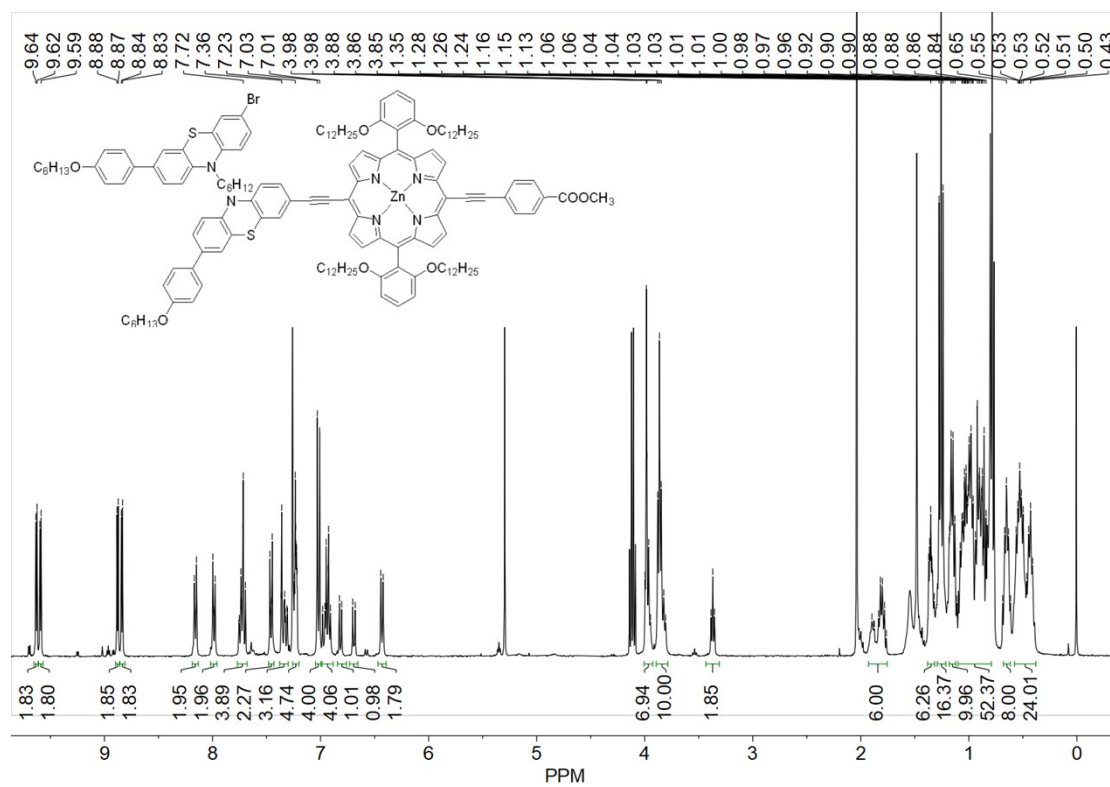

**Figure S15** The <sup>1</sup>H NMR spectrum of compound 2a in CDCl<sub>3</sub>.

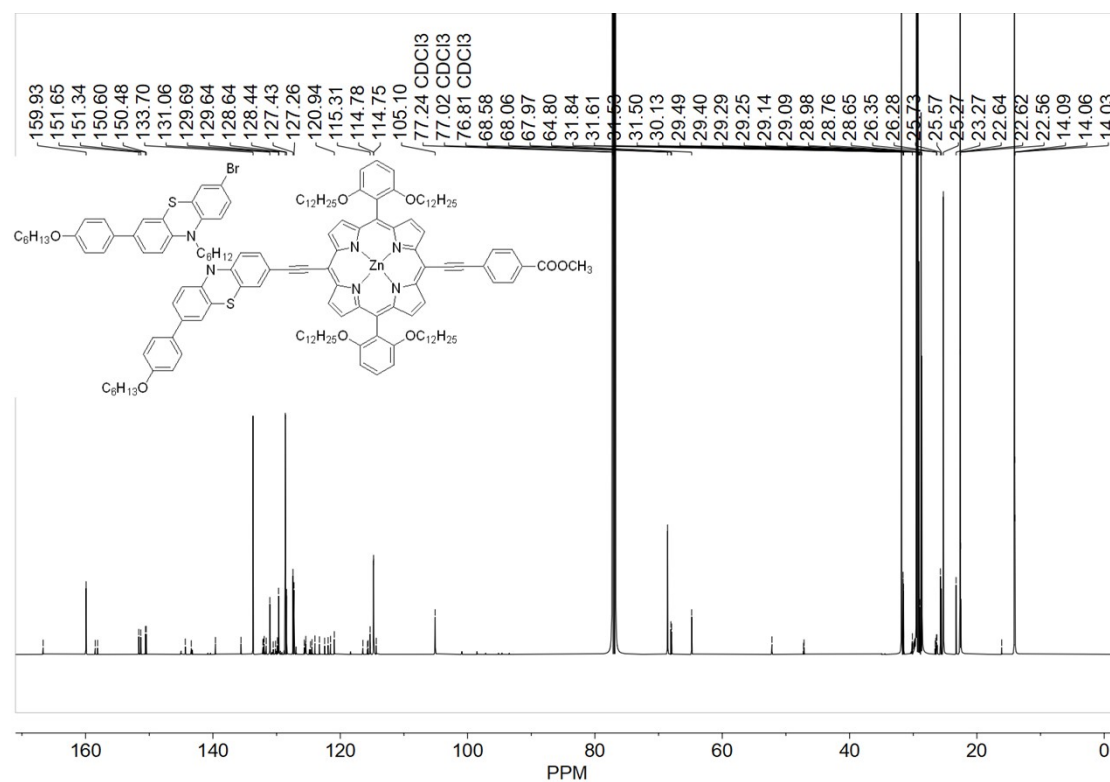

**Figure S16** The <sup>13</sup>C NMR spectrum of compound 2a in CDCl<sub>3</sub>.

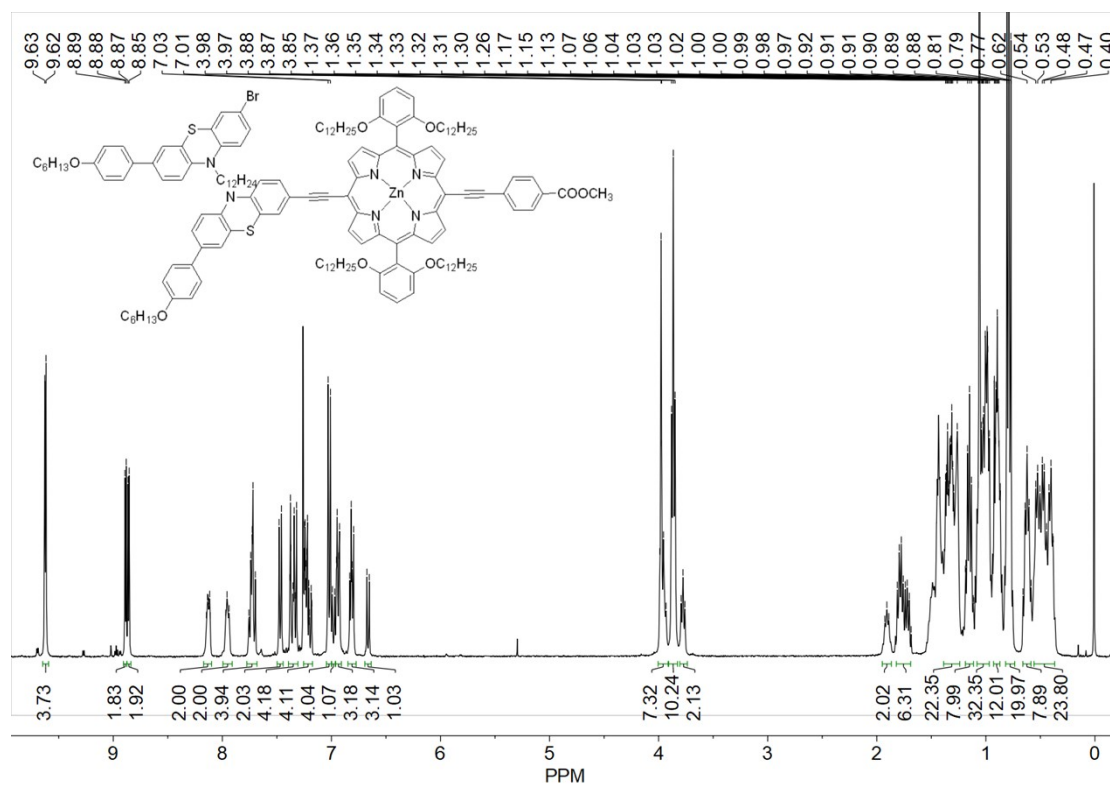

**Figure S17** The <sup>1</sup>H NMR spectrum of compound **2b** in CDCl<sub>3</sub>.

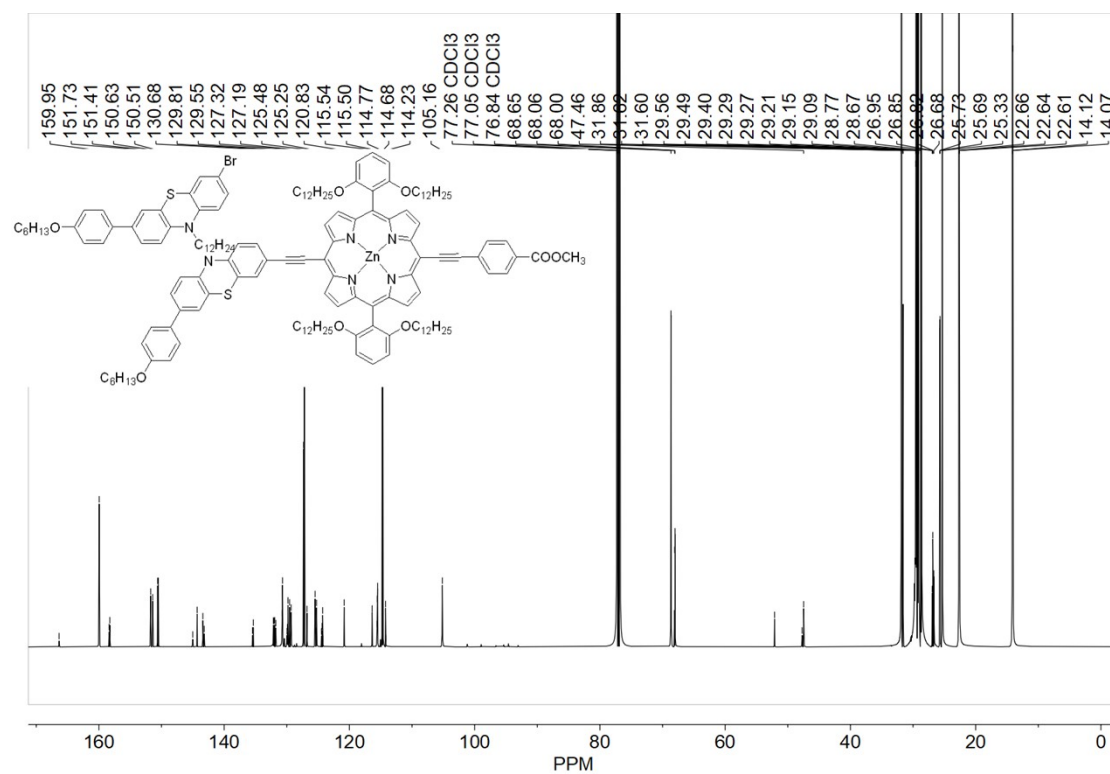

**Figure S18** The <sup>13</sup>C NMR spectrum of compound **2b** in CDCl<sub>3</sub>.



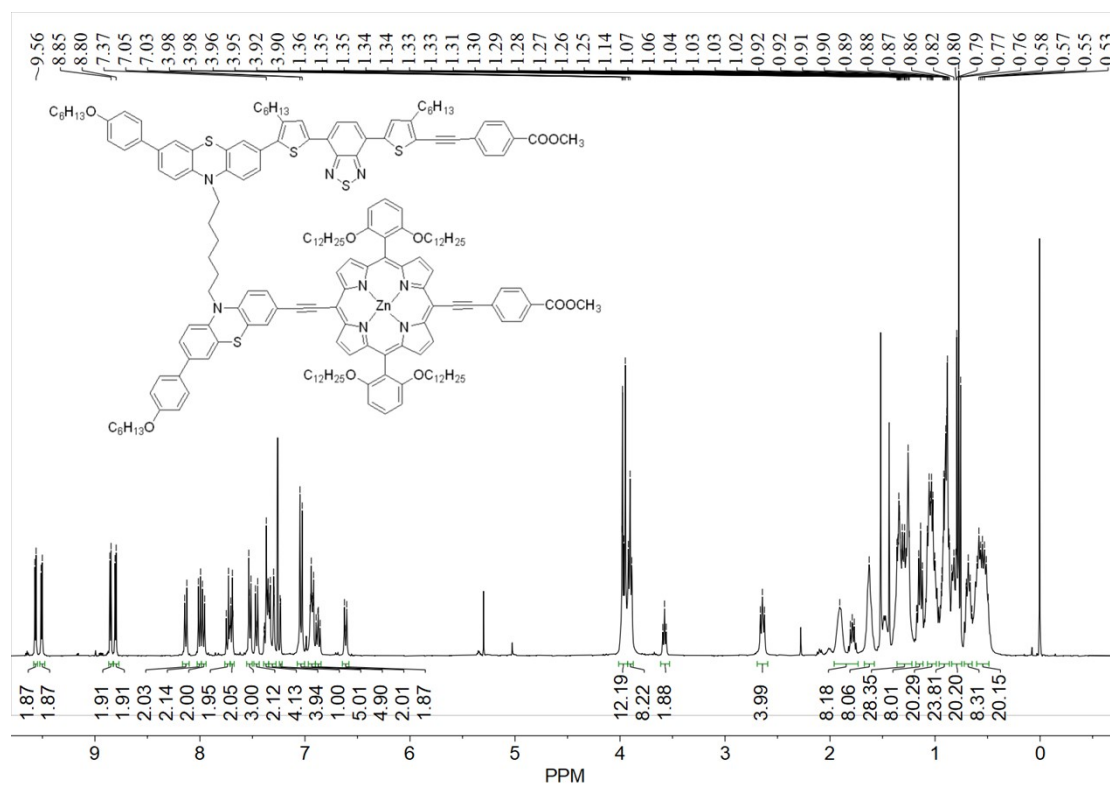

Figure S19 The <sup>1</sup>H NMR spectrum of compound 3a in CDCl<sub>3</sub>.

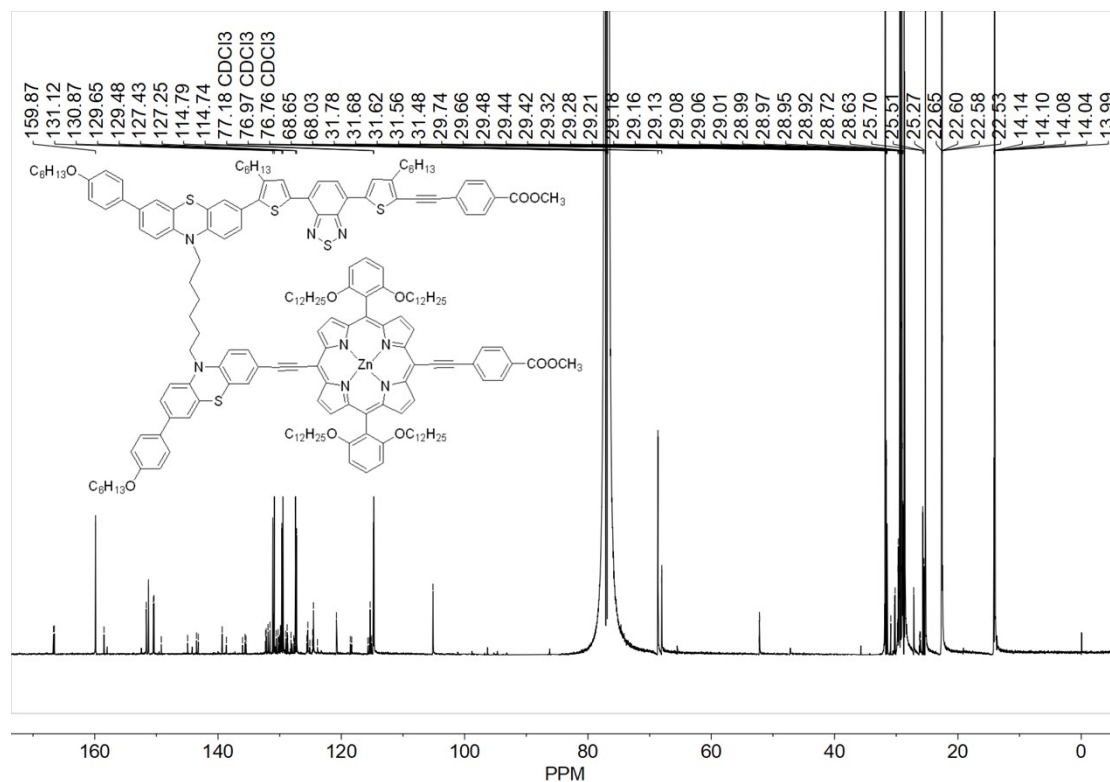

Figure S20 The <sup>13</sup>C NMR spectrum of compound 3a in CDCl<sub>3</sub>.

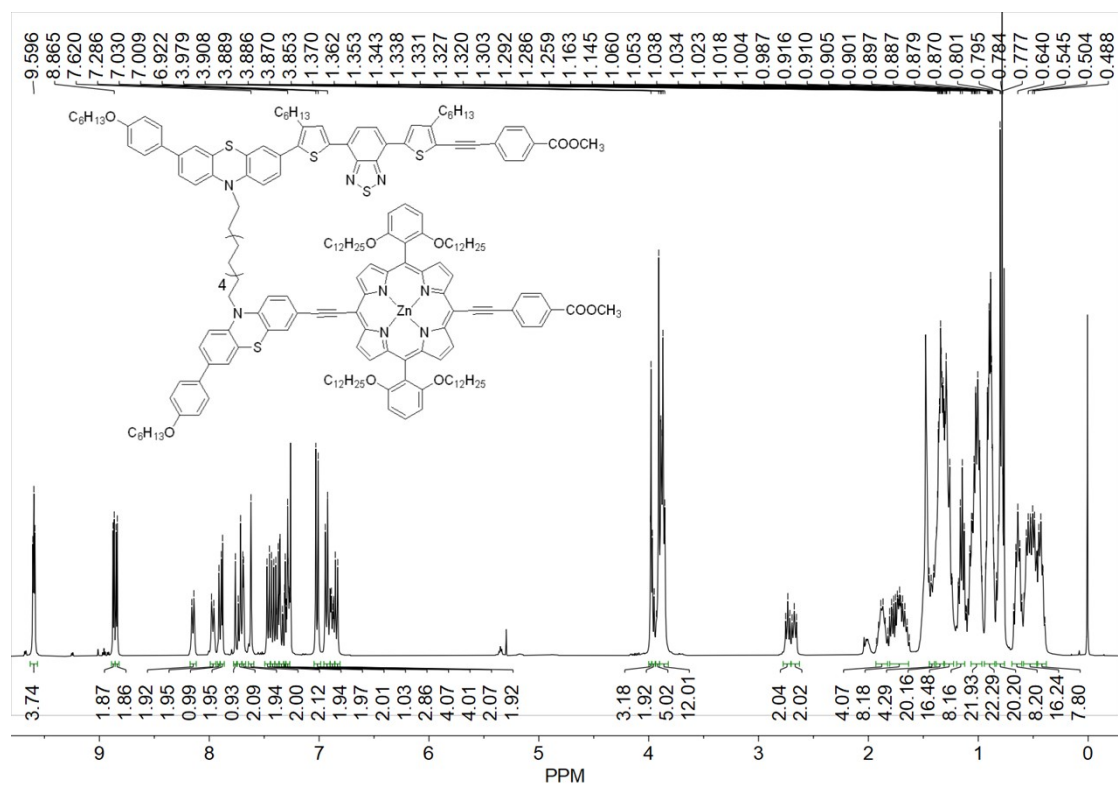

**Figure S21** The  $^1\text{H}$  NMR spectrum of compound **3b** in  $\text{CDCl}_3$ .

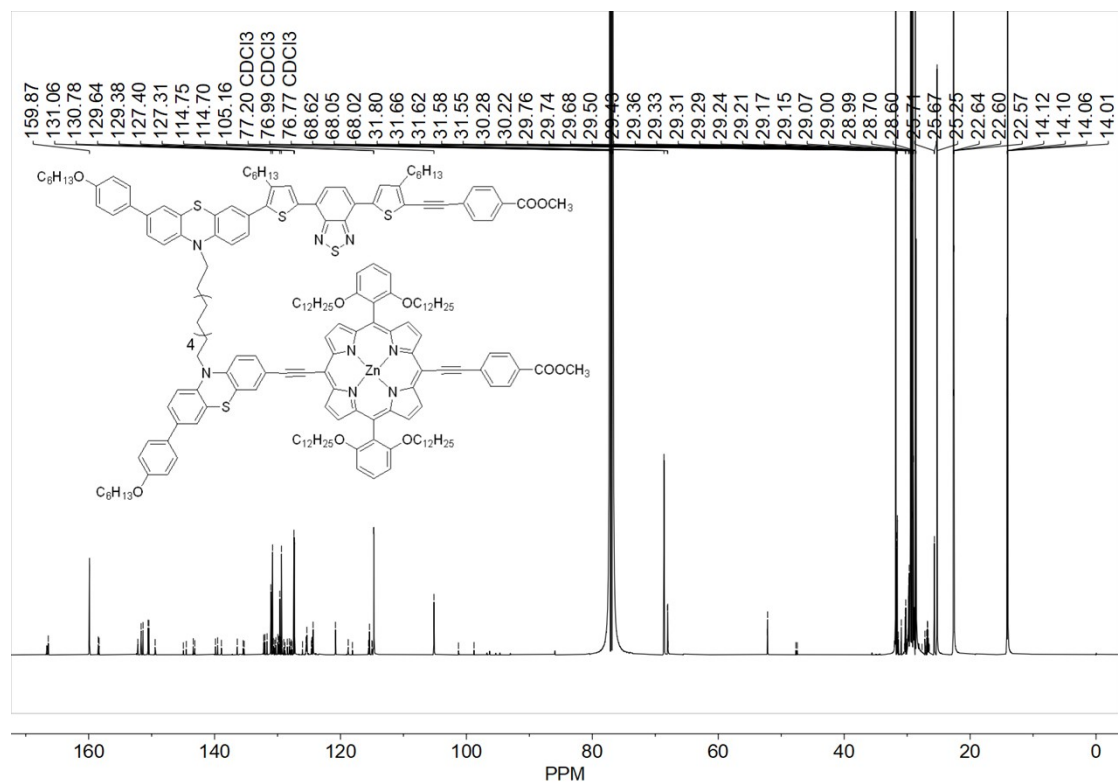

**Figure S22** The  $^{13}\text{C}$  NMR spectrum of compound **3b** in  $\text{CDCl}_3$ .

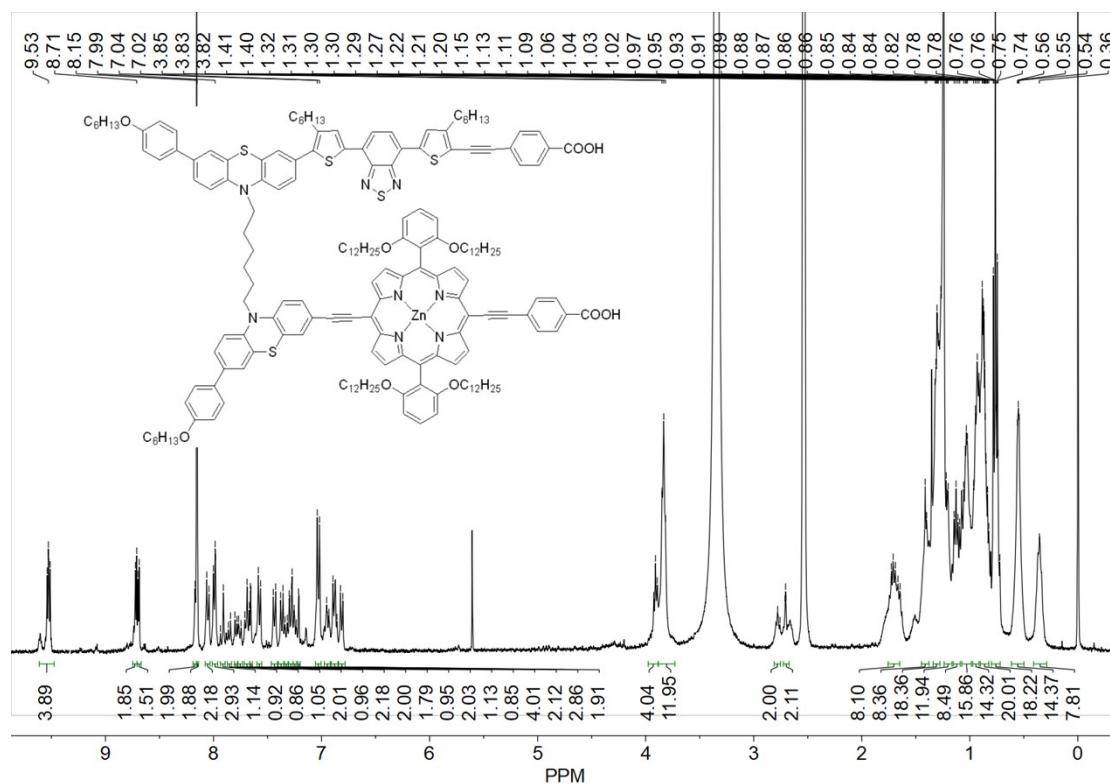

**Figure S23** The  $^1\text{H}$  NMR spectrum of compound **XW85** in  $\text{CDCl}_3/\text{DMSO}-d_6$  (1/2, v/v).

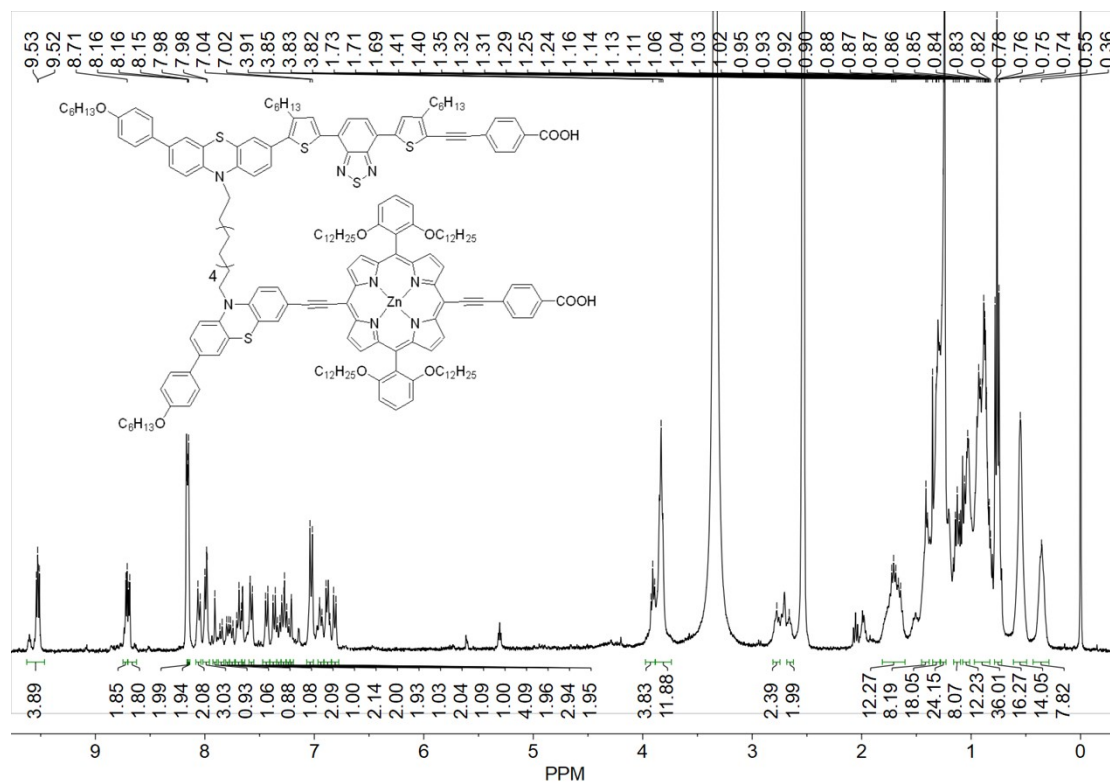

**Figure S24** The  $^1\text{H}$  NMR spectrum of compound **XW86** in  $\text{CDCl}_3/\text{DMSO}-d_6$  (1/2, v/v).

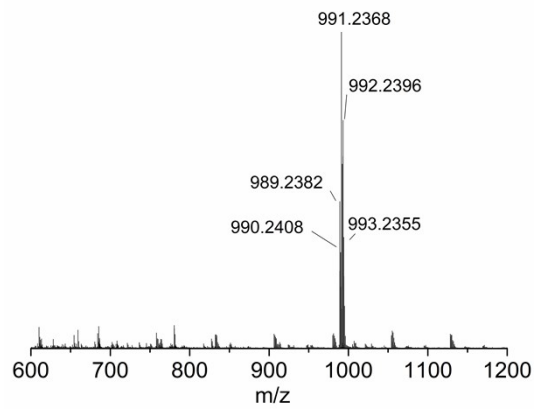

**Figure S25** HRMS of compound **1a**.

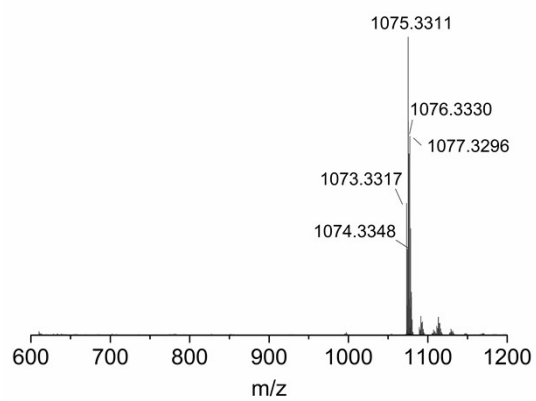

**Figure S26** HRMS of compound **1b**.

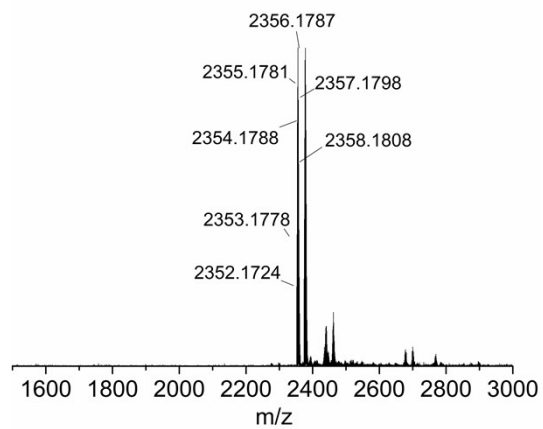

**Figure S27** HRMS of compound **2a**.

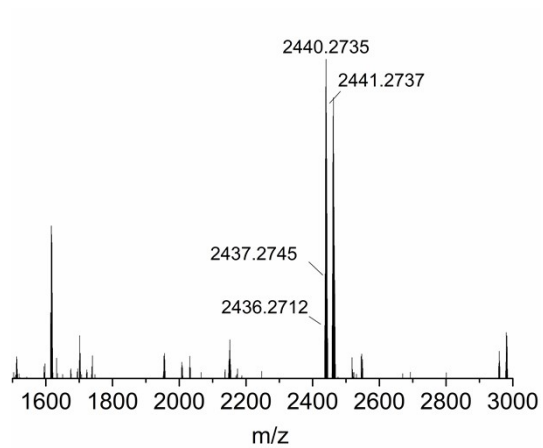

Figure S28 HRMS of compound 2b.

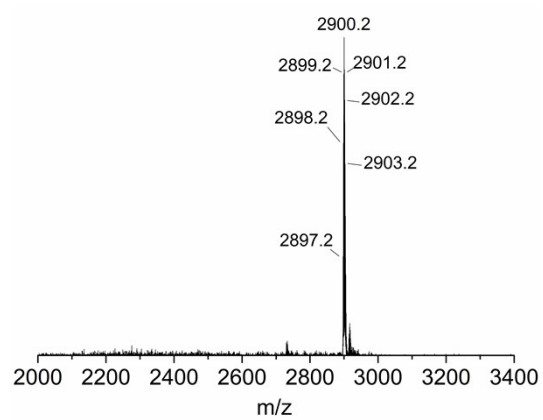

Figure S29 MALDI-TOF MS of compound 3a.

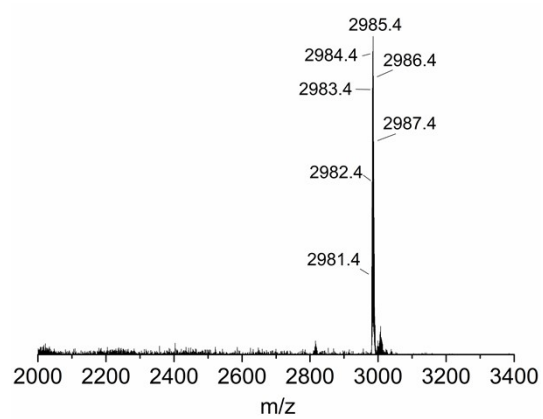

Figure S30 MALDI-TOF MS of compound 3b.

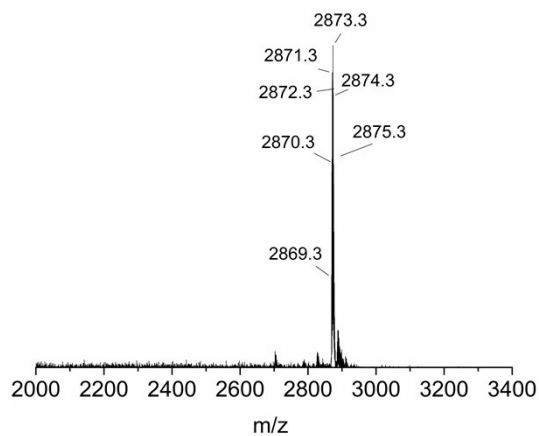

**Figure S31** MALDI-TOF MS of XW85.

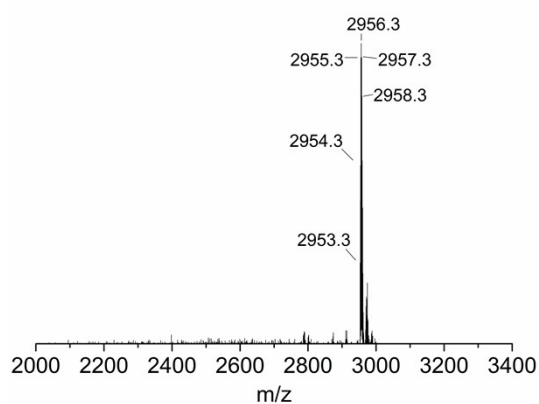

**Figure S32** MALDI-TOF MS of XW86.

## 10 References

1. J. J. P. Stewart, *J. Mol. Model.*, 2007, **13**, 1173-1213.
2. M. Korth, M. Pitoňák, J. Řezáč and P. Hobza, *J. Chem. Theory Comput.*, 2010, **6**, 344-352.
3. M. Pazoki, U. B. Cappel, E. M. J. Johansson, A. Hagfeldt and G. Boschloo, *Energy Environ. Sci.*, 2017, **10**, 672-709.
4. F. Fabregat-Santiago, G. Garcia-Belmonte, I. Mora-Seró and J. Bisquert, *Phys. Chem. Chem. Phys.*, 2011, **13**, 9083-9118.
